# Supplementary material for: UTI Biomarkers in Symptomatic Patients are Significantly Elevated at Microbial Densities of 10,000 cells or CFUs per mL Indicating a Lower Microbial Density Threshold for Diagnosing UTIs
Source: Preprints.org preprint supplement (doi:10.20944/preprints202307.0001.v1), 2023-07-03
Supplement: Supplementary file 2 [file supplementary]

Type of the Paper (Article, Review, Communication, etc.)

UTI Biomarkers in Symptomatic Patients are Significantly Elevated at Microbial Densities of 10,000 cells or CFUs per mL Indicating a Lower Microbial Density Threshold for Diagnosing UTIs

Laura Parnell1, Natalie Luke2, Mohit Mathur3, Richard Festa4, Emery Haley2, Michael Percaccio4, Jesus Magallon4, Mariana Remedios-Chan4, Alain Rosas4, Jimin Wang5, Yan Jiang5, Lori Anderson6,David Baunoch4*

| **Citation:** To be added by editorial staff during production.  Academic Editor: Firstname Lastname  Received: date  Revised: date  Accepted: date  Published: date  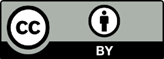  **Copyright:** © 2023 by the authors. Submitted for possible open access publication under the terms and conditions of the Creative Commons Attribution (CC BY) license (https://creativecommons.org/licenses/by/4.0/). |
| --- |

1Department of Scientific Writing, Precision Consulting, 6522 Harbor Mist, Missouri City, TX, USA 77459

2Department of Clinical Research, Pathnostics, 15545 Sand Canyon Suite 100, Irvine, CA, USA 92618

3Department of Medical Affairs, Pathnostics, 15545 Sand Canyon Suite 100, Irvine, CA, USA 92618

4Department of Research and Development, Pathnostics, 15545 Sand Canyon Suite 100, Irvine, CA, USA 92618

5Department of Statistical Analysis, Stat4Ward, 2 Edgemoor Lane, Pittsburgh, PA, USA 15238

6Department of Diagnostic Market Access, Pathnostics, 15545 Sand Canyon Suite 100, Irvine, CA, USA 92618

*****Correspondence: dbaunoch@pathnostics.com; Tel.: 714-966-1221.

**Supplementary Table S1.** Bacterial Identification and Frequency by M-PCR and SUC in UTI symptomatic patients.
